# Supplementary material for: Antibiotic-loaded gelatin fibers fighting bacteria resistant to antibiotics: a case of spectinomycin-resistant Escherichia coli
Source: Royal Society of Chemistry journal article supplement (doi:10.1039/d3ma01140b), 2024-01-01
Supplement: d3ma01140b1.pdf [file d3ma01140b1.pdf]

## Supporting Information

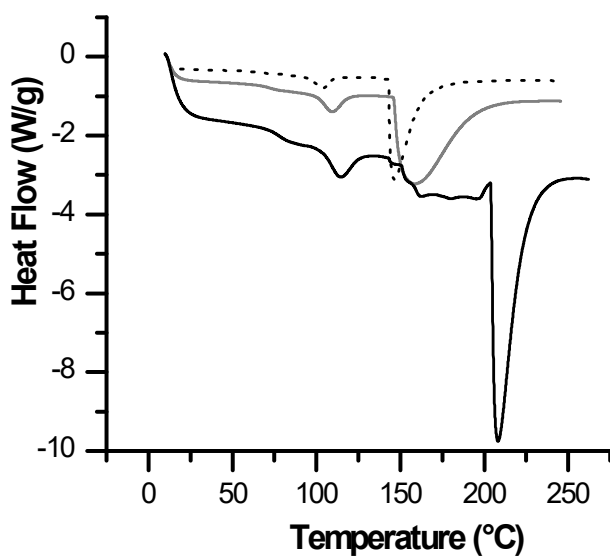

**Figure SI 1:** DSC curves for gelatin at 10 (...), 20 (—) and 40°C/min (—)

**Table SI 2.** Characteristic temperature extracted from DSC analyses in Figure SI 1

|                 | $T_m$ (°C) | $T_d$ (°C) | $\Delta H_d$ (J/g) |
|-----------------|------------|------------|--------------------|
| <b>10°C/min</b> | 104.2      | 146.4      | 235.6              |
| <b>20°C/min</b> | 109.6      | 158.5      | 218.7              |
| <b>40°C/min</b> | 114.5      | 208.2      | 135.4              |

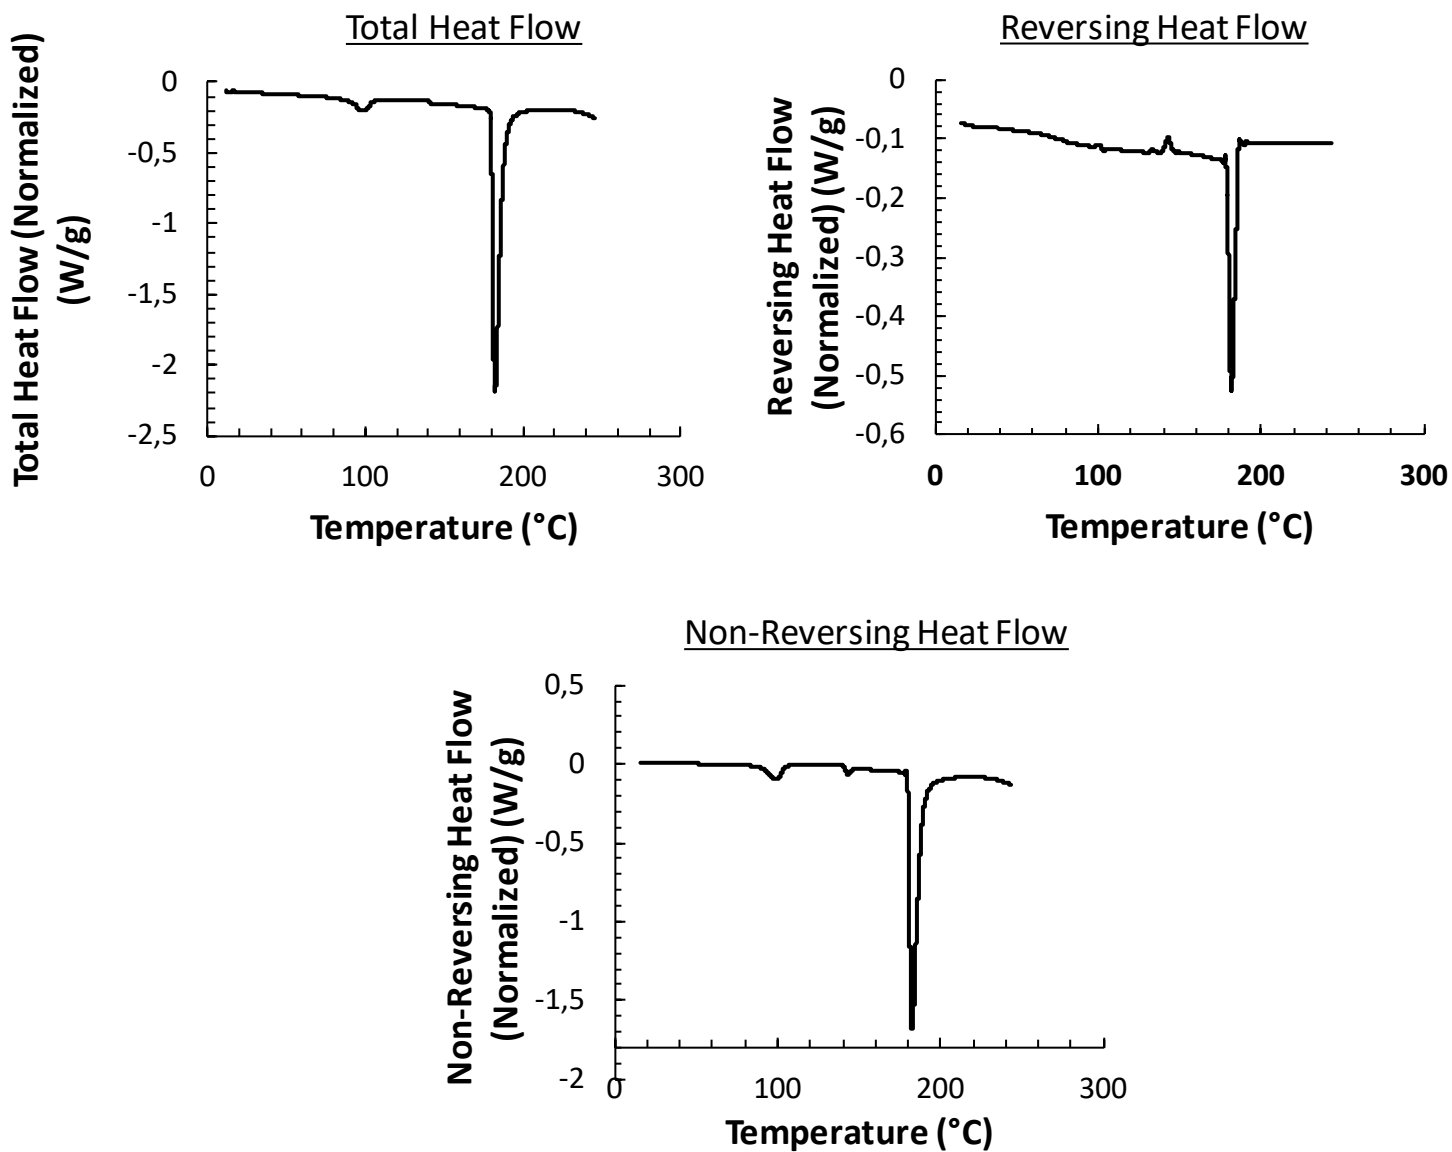

**Figure SI 2.** Modulated DSC curves for gelatin powder

**Table SI 2.** Characteristic temperature extracted from the DSC analyses in Figure SI 2

|                                | $T_m$ (°C) | $T_d'$ (°C) | $T_d$ (°C) | $\Delta H_d$ (J/g) |
|--------------------------------|------------|-------------|------------|--------------------|
| <b>Total Heat Flow</b>         | 99.1       | 143.6       | 182.3      | 223.6              |
| <b>Reversing Heat Flow</b>     | -          | 142.9       | 181.9      | 37.6               |
| <b>Non reversing Heat Flow</b> | 99.3       | 143.0       | 182.5      | 186.0              |

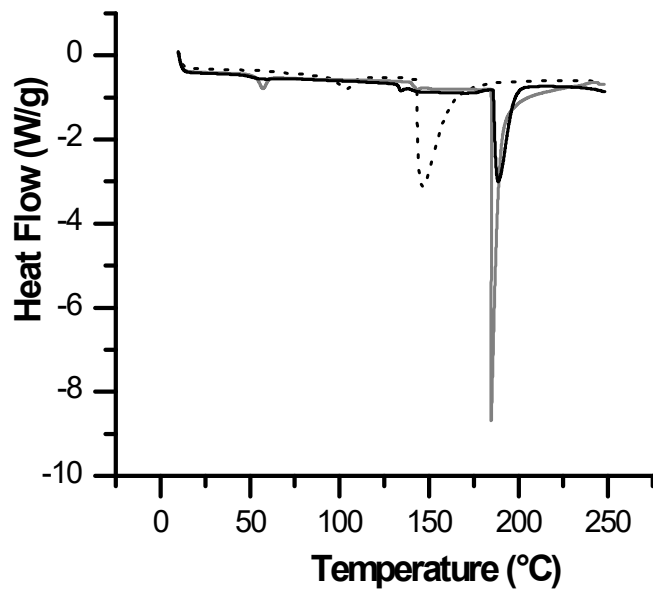

**Figure SI 3.** DSC curves for gelatin powder (...), electrospun gelatin (—) and gelatin fibers (—) obtained at 10°C per minute

**Table SI 3.** Characteristic temperature extracted from the DSC analyses in Figure SI 3

|                            | $T_g$ (°C) | $T_d$ (°C) | $\Delta H_d$ (J/g) |
|----------------------------|------------|------------|--------------------|
| <b>Gelatin powder</b>      | 79.5       | 146.4      | 235.6              |
| <b>Electrospun gelatin</b> | 51.5       | 184.7      | 206.8              |
| <b>Gelatin film</b>        | 50.7       | 188.7      | 157.5              |

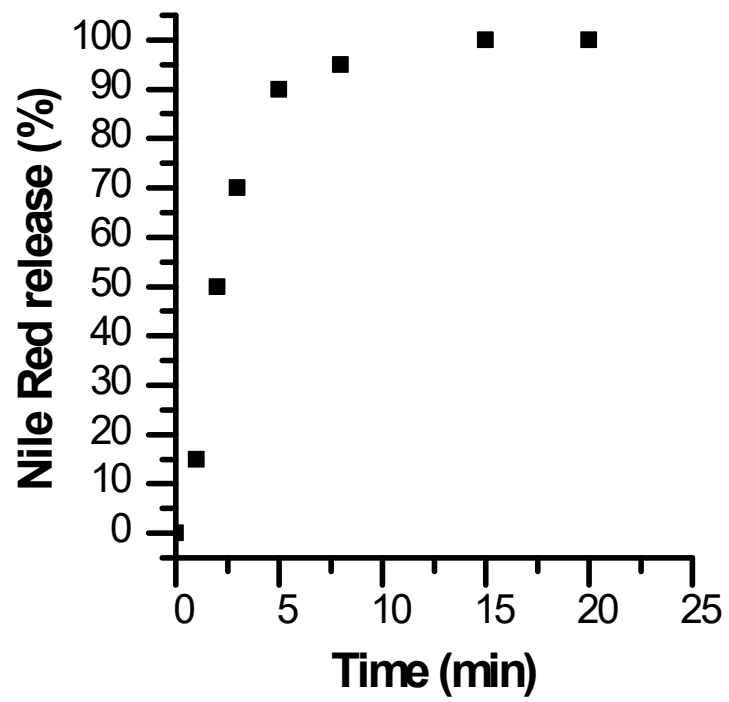

**Figure SI 4.** Nile red release from gelatin/Nile red (37°C, pH 7.4)
